# Supplementary material for: The impact of central obesity on the risk of hospitalization or death due to heart failure in type 1 diabetes: a 16-year cohort study
Source: PubMed Central journal article supplement (PMC8314504; doi:10.1186/s12933-021-01340-4), 2021-07-27

Add. 1.a

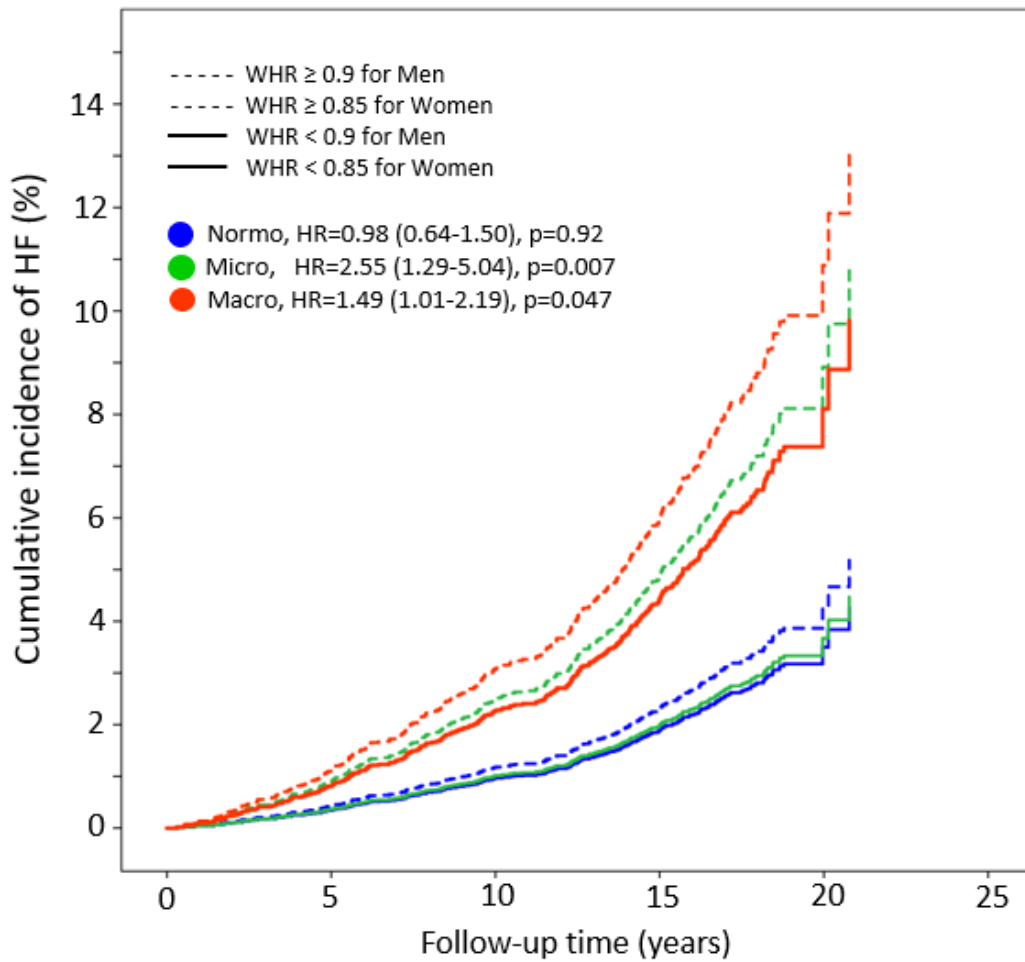

Add. 1.b

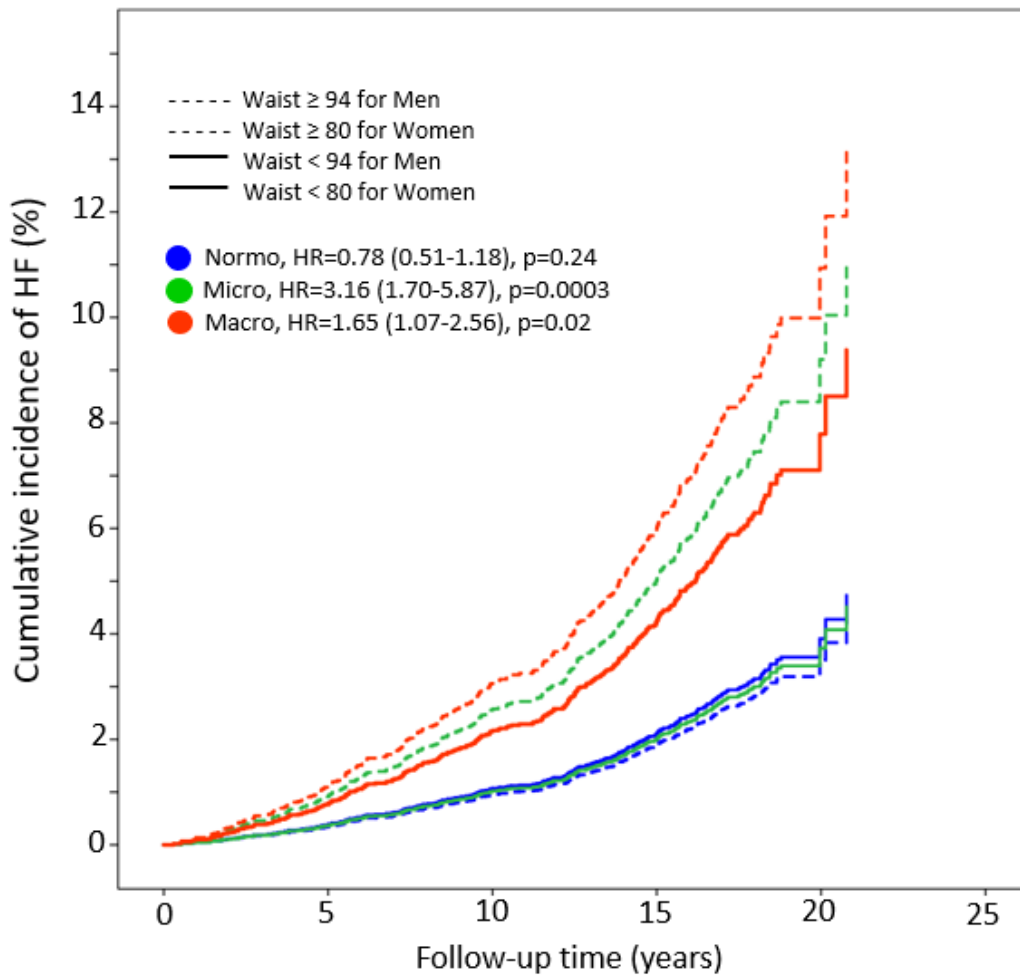

Add. 1.c

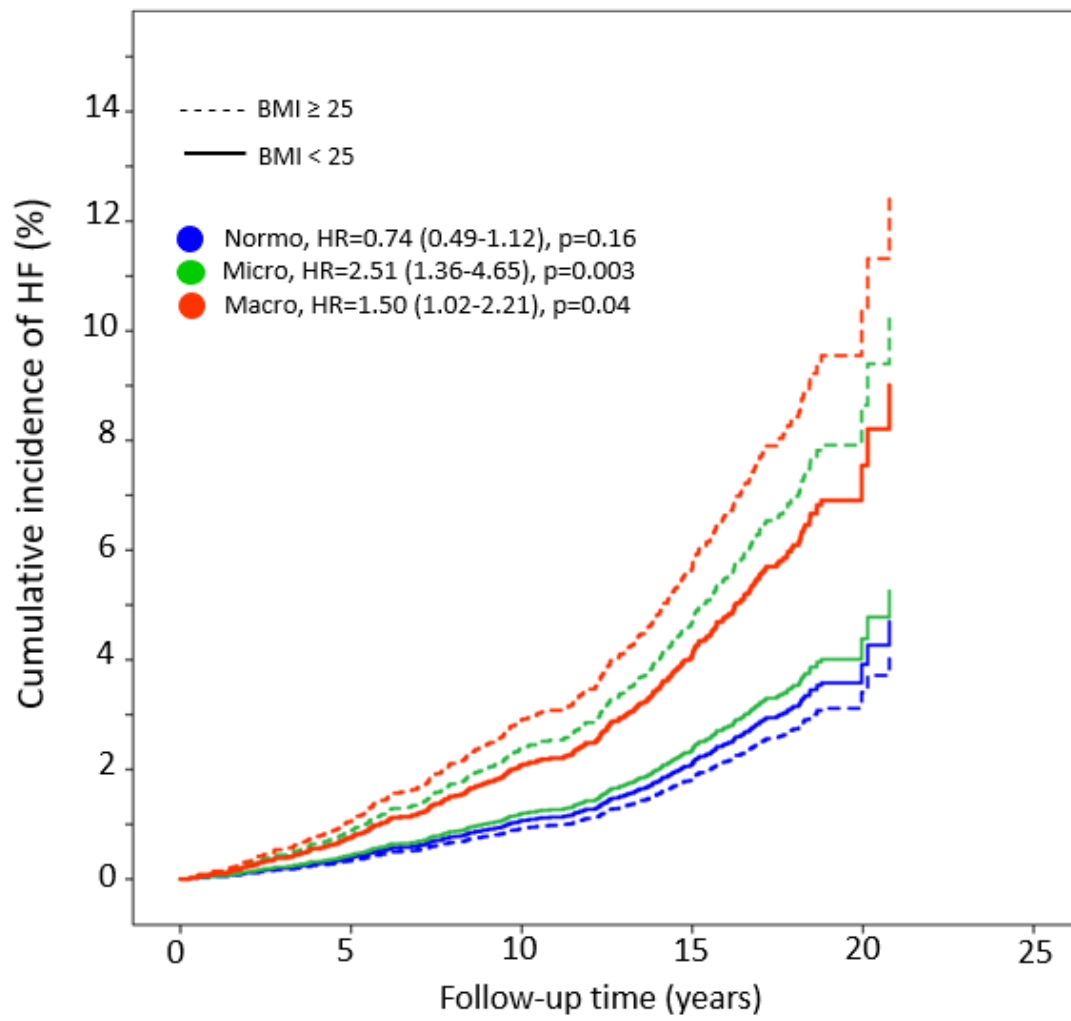

Supplement: 12933_2021_1340_MOESM2_ESM.pdf [file 12933_2021_1340_MOESM2_ESM.pdf]
